# Supplementary material for: Development and clinical validation of deep learning for auto-diagnosis of supraspinatus tears
Source: PubMed Central journal article supplement (PMC10262398; doi:10.1186/s13018-023-03909-z), 2023-06-13
Supplement: 13018_2023_3909_MOESM1_ESM.pdf [file 13018_2023_3909_MOESM1_ESM.pdf]

## Additional Files 1

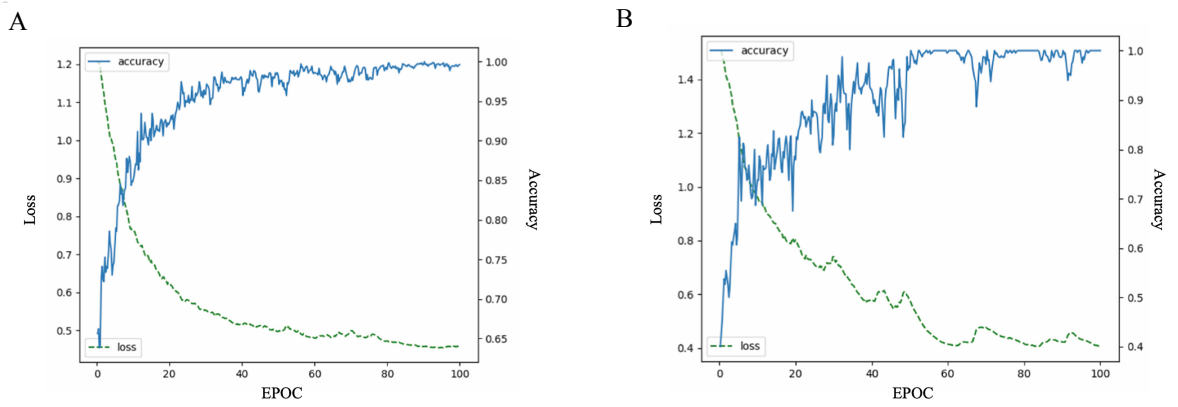

**Additional figure 1.** Training curves of the 2D (A) and 3D (B) CNN models.
