# Supplementary material for: Development and clinical validation of deep learning for auto-diagnosis of supraspinatus tears
Source: PubMed Central journal article supplement (PMC10262398; doi:10.1186/s13018-023-03909-z), 2023-06-13
Supplement: 13018_2023_3909_MOESM2_ESM.pdf [file 13018_2023_3909_MOESM2_ESM.pdf]

**Additional Files 2**

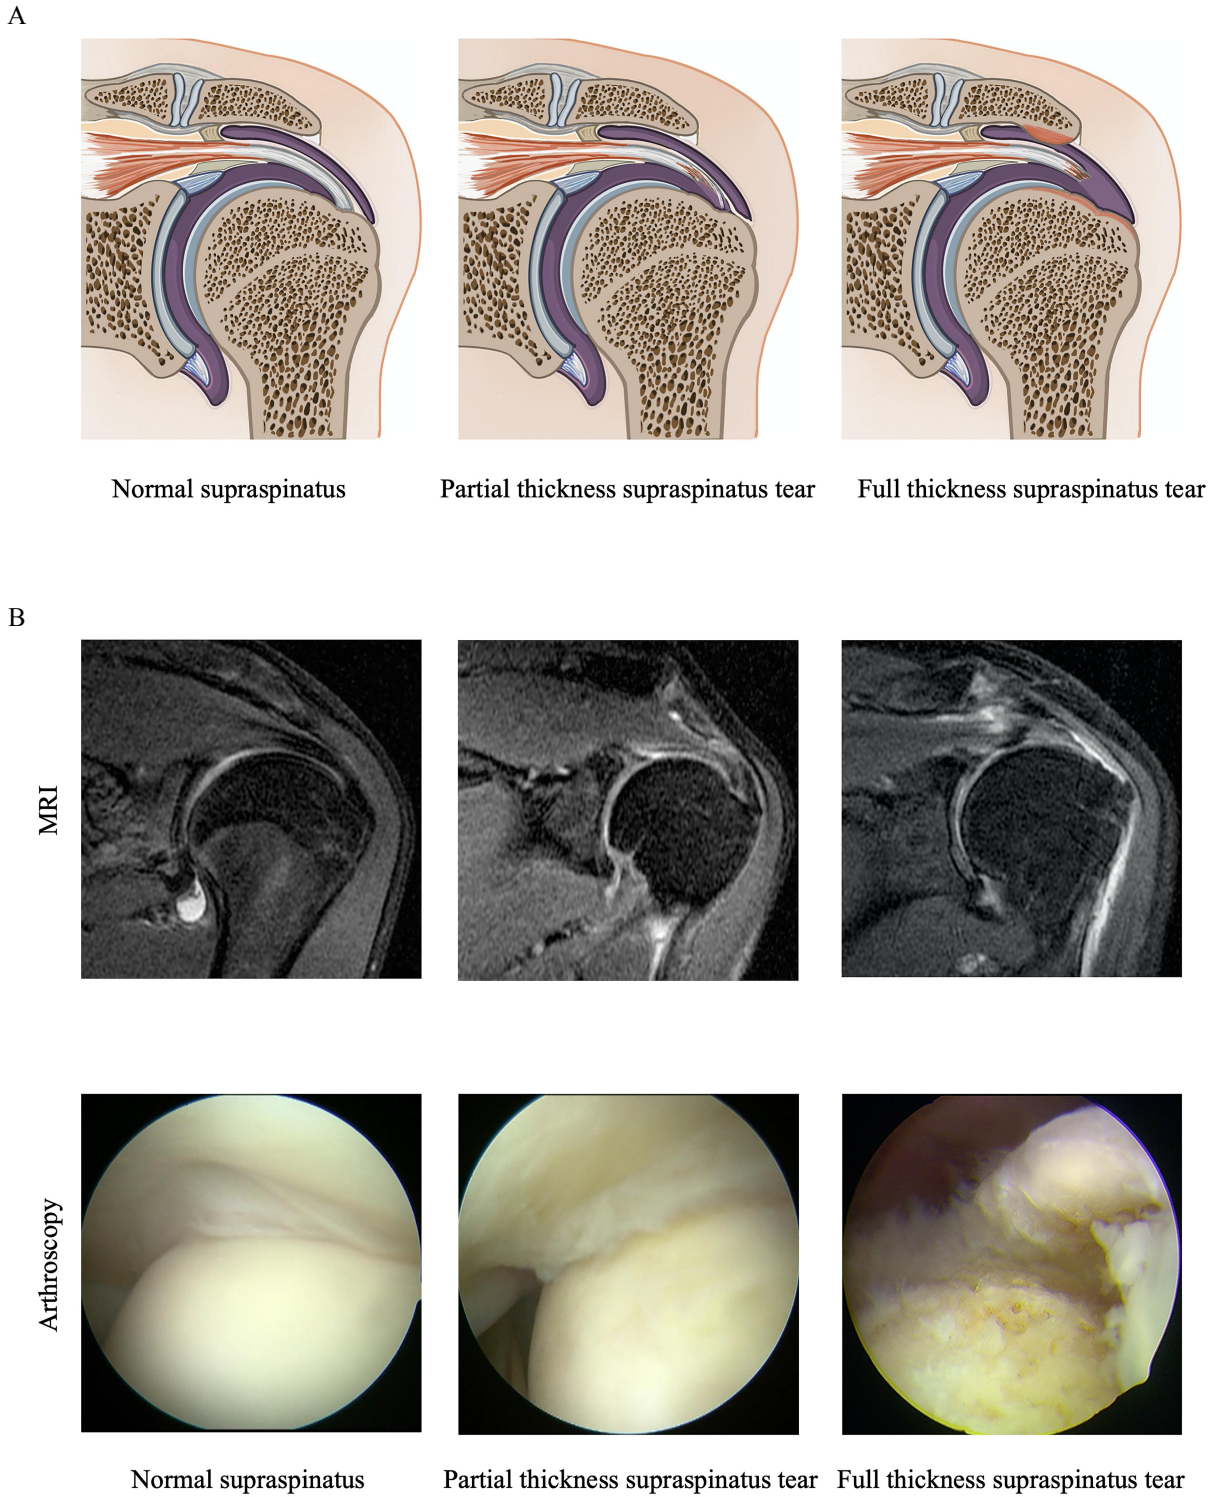

**Additional Figure 2.** Different ST subtypes. (a) Histological damage diagram. (b) Representative images on MRI and arthroscopy. ST, supraspinatus tear.
