# Supplementary material for: Development and clinical validation of deep learning for auto-diagnosis of supraspinatus tears
Source: PubMed Central journal article supplement (PMC10262398; doi:10.1186/s13018-023-03909-z), 2023-06-13
Supplement: 13018_2023_3909_MOESM3_ESM.pdf [file 13018_2023_3909_MOESM3_ESM.pdf]

### Additional Files 3

**Additional Table 1.** Diagnostic performance of 2D and 3D CNN models and participated reading clinicians on surgery and internal test sets.

|                   | Metrics              | Accuracy           | Precision        | Sensitivity      | Specificity      | F1-score | Youden-Index |
|-------------------|----------------------|--------------------|------------------|------------------|------------------|----------|--------------|
| Surgery test set  | 2D CNN               | 0.87<br>(60/69)    | 0.75<br>(21/28)  | 0.913<br>(21/23) | 0.848<br>(39/46) | 0.824    | 0.761        |
|                   | 3D CNN               | 0.71<br>(49/69)    | 0.54<br>(17/31)  | 0.739<br>(17/23) | 0.696<br>(32/46) | 0.624    | 0.435        |
|                   | Senior Surgeon 1     | 0.913<br>(63/69)   | 0.84<br>(21/25)  | 0.913<br>(21/23) | 0.913<br>(42/46) | 0.875    | 0.826        |
|                   | Senior Surgeon 2     | 0.869<br>(60/69)   | 0.733<br>(22/30) | 0.957<br>(22/23) | 0.826<br>(38/46) | 0.83     | 0.783        |
|                   | Junior Surgeon 3     | 0.782<br>(54/69)   | 0.611<br>(22/36) | 0.957<br>(22/23) | 0.696<br>(32/46) | 0.746    | 0.653        |
|                   | Junior Surgeon 4     | 0.739<br>(51/69)   | 0.571<br>(20/35) | 0.870<br>(20/23) | 0.674<br>(31/46) | 0.689    | 0.544        |
|                   | Senior Radiologist 5 | 0.884<br>(61/69)   | 0.778<br>(21/27) | 0.913<br>(21/23) | 0.870<br>(40/46) | 0.84     | 0.783        |
|                   | Senior Radiologist 6 | 0.841<br>(58/69)   | 0.688<br>(22/32) | 0.957<br>(22/23) | 0.783<br>(36/46) | 0.801    | 0.74         |
|                   | Junior Radiologist 7 | 0.797<br>(55/69)   | 0.636<br>(21/33) | 0.913<br>(21/23) | 0.739<br>(34/46) | 0.75     | 0.652        |
|                   | Junior Radiologist 8 | 0.753<br>(52/69)   | 0.588<br>(20/34) | 0.870<br>(20/23) | 0.696<br>(32/46) | 0.702    | 0.566        |
| Internal test set | 2D CNN               | 0.818<br>(117/143) | 0.72<br>(39/54)  | 0.78<br>(39/50)  | 0.839<br>(78/93) | 0.75     | 0.619        |
|                   | 3D CNN               | 0.783<br>(112/143) | 0.679<br>(36/53) | 0.72<br>(36/50)  | 0.817<br>(76/93) | 0.699    | 0.537        |
|                   | Senior Surgeon 1     | 0.909<br>(130/143) | 0.849<br>(45/53) | 0.9<br>(45/50)   | 0.914<br>(85/93) | 0.874    | 0.814        |
|                   | Senior Surgeon 2     | 0.804<br>(115/143) | 0.66<br>(44/66)  | 0.88<br>(44/50)  | 0.763<br>(71/93) | 0.754    | 0.643        |
|                   | Junior Surgeon 3     | 0.797<br>(114/143) | 0.657<br>(44/67) | 0.88<br>(44/50)  | 0.753<br>(70/93) | 0.752    | 0.633        |
|                   | Junior Surgeon 4     | 0.804<br>(115/143) | 0.683<br>(41/60) | 0.82<br>(41/50)  | 0.796<br>(74/93) | 0.745    | 0.616        |
|                   | Senior Radiologist 5 | 0.846<br>(121/143) | 0.733<br>(44/60) | 0.88<br>(44/50)  | 0.828<br>(77/93) | 0.8      | 0.708        |
|                   | Senior Radiologist 6 | 0.832<br>(119/143) | 0.717<br>(43/60) | 0.86<br>(43/50)  | 0.817<br>(76/93) | 0.782    | 0.677        |
|                   | Junior Radiologist 7 | 0.790<br>(113/143) | 0.607<br>(38/56) | 0.76<br>(38/50)  | 0.806<br>(75/93) | 0.675    | 0.566        |
|                   | Junior Radiologist 8 | 0.727<br>(104/143) | 0.596<br>(34/57) | 0.72<br>(36/50)  | 0.795<br>(74/93) | 0.652    | 0.516        |
