# Supplementary material for: Development and clinical validation of deep learning for auto-diagnosis of supraspinatus tears
Source: PubMed Central journal article supplement (PMC10262398; doi:10.1186/s13018-023-03909-z), 2023-06-13
Supplement: 13018_2023_3909_MOESM4_ESM.pdf [file 13018_2023_3909_MOESM4_ESM.pdf]

## Additional Files 4

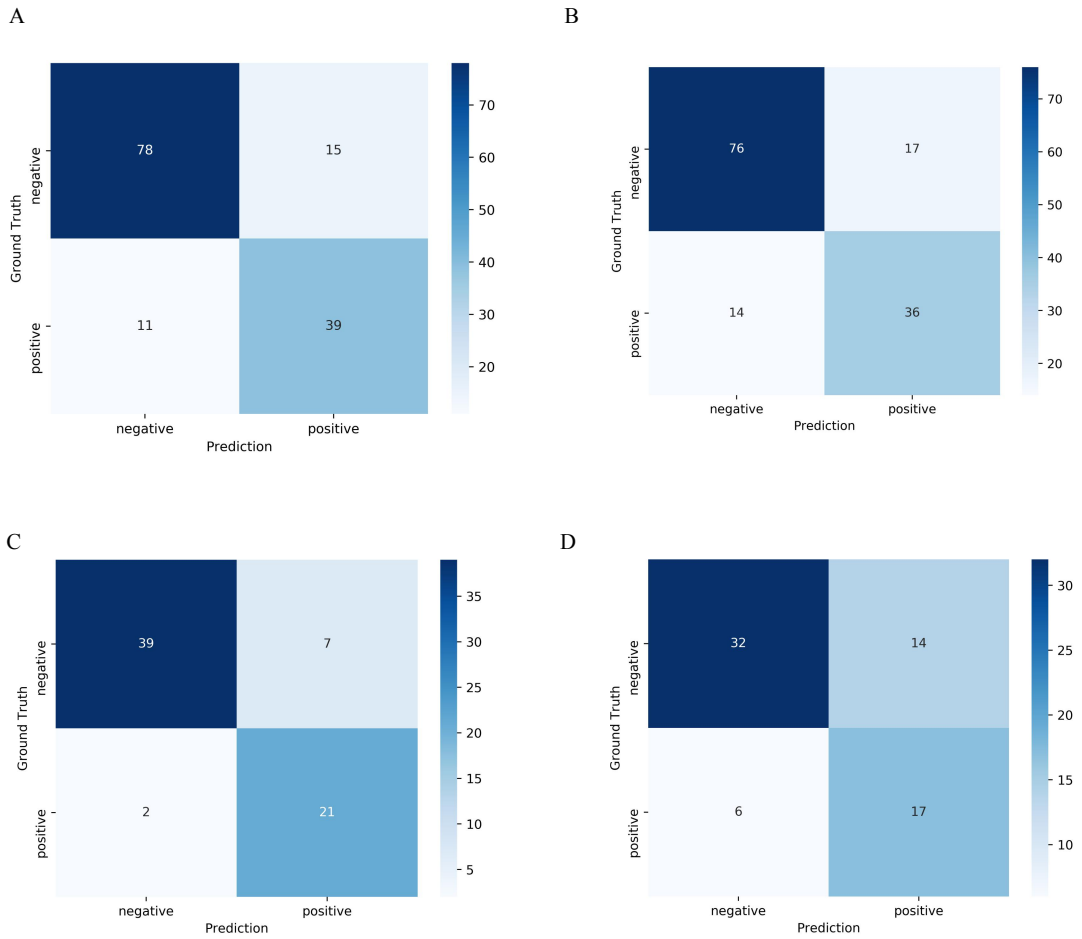

**Additional Figure 3.** 2-class confusion matrices of models on test set. (A) 2-class confusion matrices of 2D model on internal test set. (B) 2-class confusion matrices of 3D model on internal test set. (C) 2-class confusion matrices of 2D model on surgery test set. (D) 2-class confusion matrices of 3D model on surgery test set. CNN, convolutional neural network; ROC, receiver operating characteristic.
