# Supplementary material for: Development and clinical validation of deep learning for auto-diagnosis of supraspinatus tears
Source: PubMed Central journal article supplement (PMC10262398; doi:10.1186/s13018-023-03909-z), 2023-06-13
Supplement: 13018_2023_3909_MOESM5_ESM.pdf [file 13018_2023_3909_MOESM5_ESM.pdf]

## Additional Files 5

**Additional Table 2.** Diagnostic performance of 2D CNN models and reading clinicians on 1.5T and 3.0 T MRI examinations.

|                   | Metrics              | 1.5T                   | 3.0T                   |
|-------------------|----------------------|------------------------|------------------------|
| Surgery test set  | 2D CNN               | 0.848 (0.662-1)        | 0.957 (0.883-1)        |
|                   | Senior Surgeon 1     | 0.8893 (0.8197-0.959)  | 0.938 (0.8671-1)       |
|                   | Senior Surgeon 2     | 0.8355 (0.758-0.9129)  | 0.8938 (0.802-0.9856)  |
|                   | Junior Surgeon 3     | 0.7886 (0.7036-0.8736) | 0.8665 (0.7735-0.9595) |
|                   | Junior Surgeon 4     | 0.7702 (0.6769-0.8635) | 0.7961 (0.6787-0.9134) |
|                   | Senior Radiologist 5 | 0.7871 (0.6977-0.8765) | 0.8402 (0.7353-0.9452) |
|                   | Senior Radiologist 6 | 0.867 (0.7969-0.9371)  | 0.7876 (0.6657-0.9095) |
|                   | Junior Radiologist 7 | 0.8208 (0.7454-0.8963) | 0.8318 (0.7208-0.9427) |
|                   | Junior Radiologist 8 | 0.7395 (0.6432-0.8357) | 0.797 (0.6757-0.9182)  |
| Internal test set | 2D CNN               | 0.887 (0.802-0.971)    | 0.86 (0.749-0.971)     |
|                   | Senior Surgeon 1     | 0.8893 (0.8197-0.959)  | 0.938 (0.8671-1)       |
|                   | Senior Surgeon 2     | 0.8355 (0.758-0.9129)  | 0.8938 (0.802-0.9856)  |
|                   | Junior Surgeon 3     | 0.7886 (0.7036-0.8736) | 0.8665 (0.7735-0.9595) |
|                   | Junior Surgeon 4     | 0.7702 (0.6769-0.8635) | 0.7961 (0.6787-0.9134) |
|                   | Senior Radiologist 5 | 0.7871 (0.6977-0.8765) | 0.8402 (0.7353-0.9452) |
|                   | Senior Radiologist 6 | 0.867 (0.7969-0.9371)  | 0.7876 (0.6657-0.9095) |
|                   | Junior Radiologist 7 | 0.8208 (0.7454-0.8963) | 0.8318 (0.7208-0.9427) |
|                   | Junior Radiologist 8 | 0.7395 (0.6432-0.8357) | 0.797 (0.6757-0.9182)  |
